# Supplementary material for: Migration Studies and Endocrine Disrupting Activities: Chemical Safety of Cosmetic Plastic Packaging
Source: MDPI journal article supplement (doi:10.3390/polym15194009), 2023-10-06
Supplement: s1 [file s1]

# **Migration Studies and Endocrine Disrupting Activities: Chemical Safety of Cosmetic Plastic Packaging**

**Elias Bou-Maroun <sup>1,\*</sup>, Laurence Dahbi <sup>2</sup>, Laurence Dujourdy <sup>3</sup>, Pierre-Jacques Ferret <sup>4</sup>, and Marie-Christine Chagnon <sup>2</sup>**

<sup>1</sup> PAM UMR A 02.102, Food and Microbiological Processes, Institut Agro, Université Bourgogne Franche-Comté, 1 Esplanade Erasme, F-21000 Dijon, France;

<sup>2</sup> Derttech "Packtox", NUTOX, INSERM U1231, Université Bourgogne Franche-Comté, F-21000 Dijon, France; laurence.dahbi@u-bourgogne.fr (L.D.); marie-christine.chagnon@u-bourgogne.fr (M.-C.C.)

<sup>3</sup> Institut Agro Dijon, Service d'Appui à la Recherche, F-21000 Dijon, France; laurence.dujourdy@agrosupdijon.fr

<sup>4</sup> Safety Assessment Department, Pierre Fabre Dermo-Cosmétique, 3 Avenue Hubert Curien, 31035 Toulouse, France; pierre-jacques.ferret@pierre-fabre.com

\* Correspondence: elias.bou-maroun@institut-agro.fr; Tel.: +33-38-077-4080

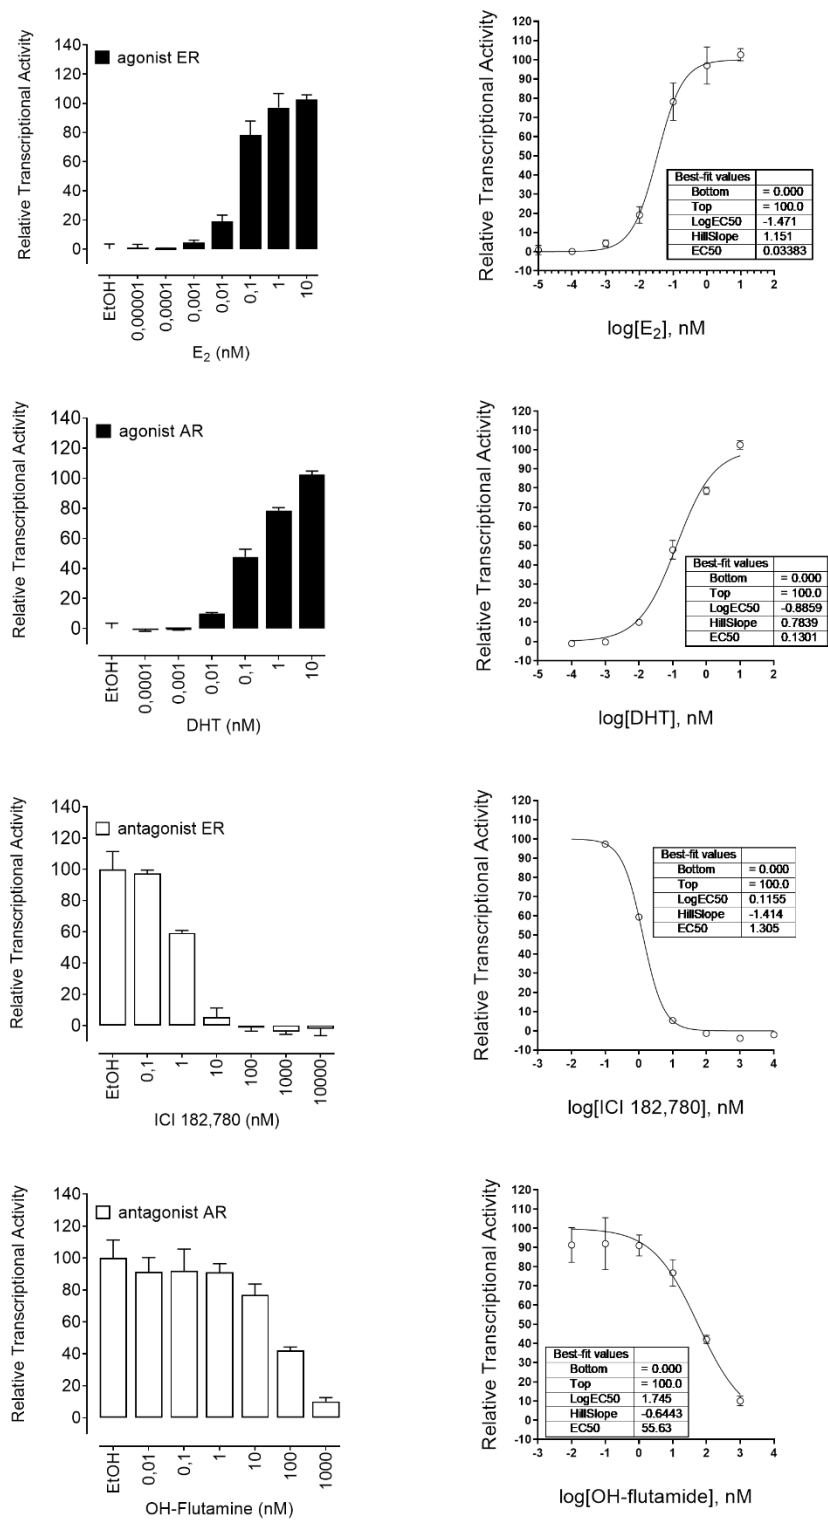

**Figure S1.** ER and AR agonism and antagonism with positive controls in HeLa-9903 (ER) and MDA-kb2 (AR) transcriptional activation assays. ER, estrogen receptor; AR, androgen receptor.

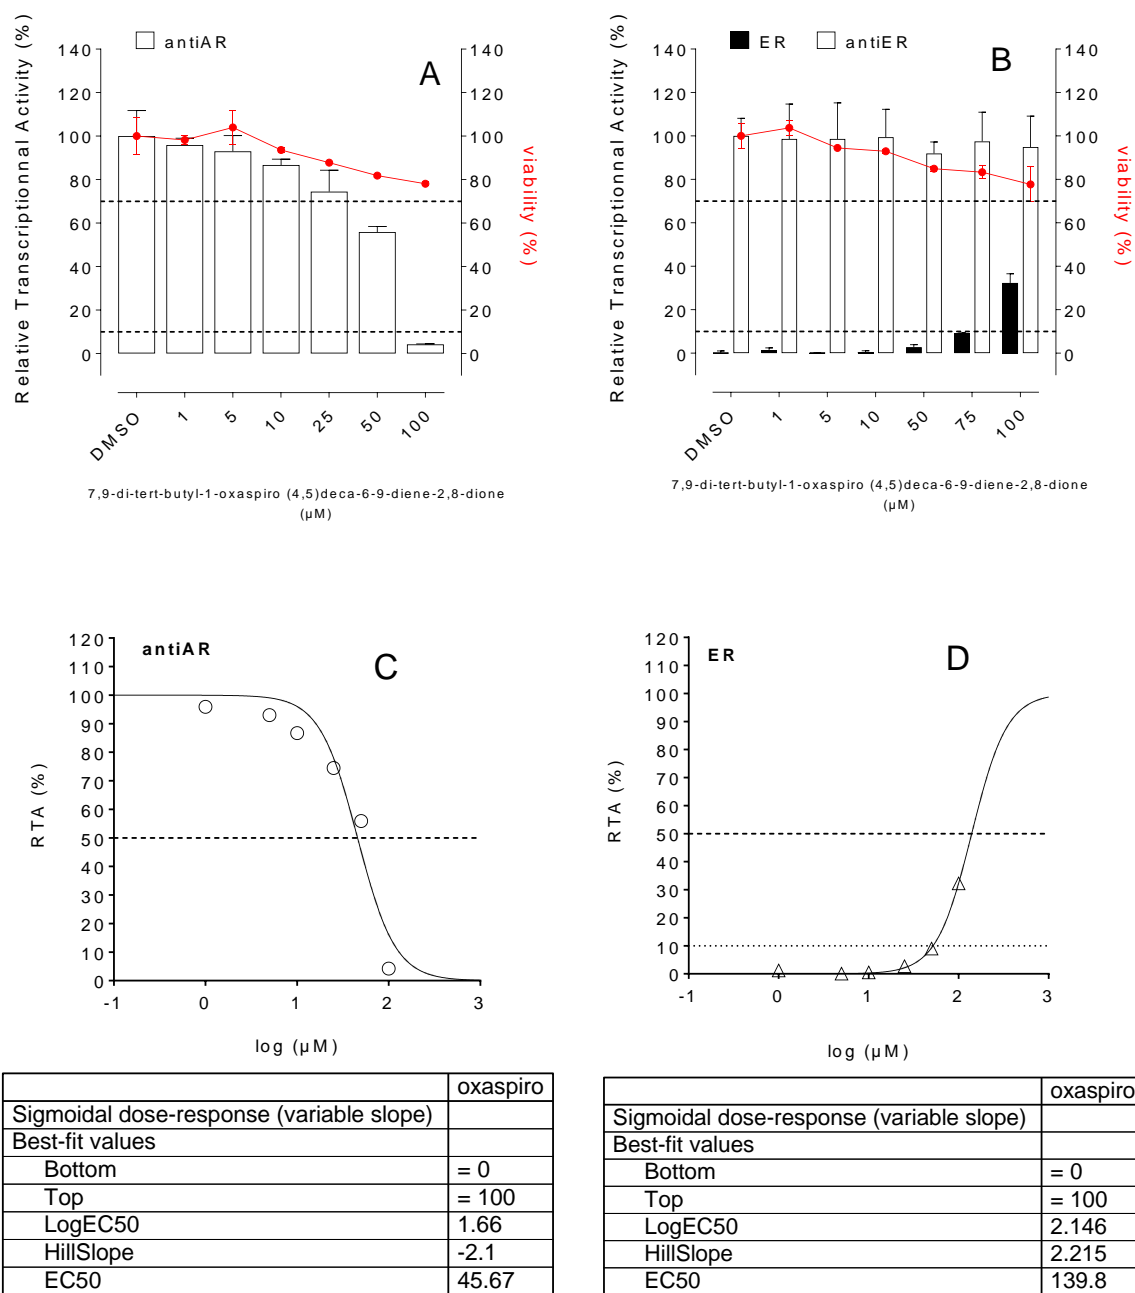

**Figure S2.** AR antagonism and ER agonism and antagonism with 7,9-di-tert-butyl-1-oxaspiro (4,5)deca-6-9-diene-2,6-dione in MDA-kb2 (AR) and Hela-9903 (ER) transcriptional activation assays. ER, estrogen receptor; AR, androgen receptor (A and B). Hill slope representation to calculate the IC<sub>50</sub> variable (C and D).

**Table S1.** Reference Chemicals: performance criteria. Values derived from the concentration response curve (log EC50, log EC10, logIC30, logIC50, Hill slope) for the reference chemicals in the ER agonist assay (A), in the ER antagonist assay (B), in the AR agonist assay (C) and in the AR antagonist assay (D).

A-Performance Criteria for Reference Chemicals in ER agonist assay

| Reference Chemicals<br>Parameter | Acceptable<br>Range (OECD<br>455) | Value |
|----------------------------------|-----------------------------------|-------|
| <i>17β-estradiol (E2)</i>        |                                   |       |
| log E50 (M)                      | -11.4 to -10.1                    | -10.5 |
| log E10 (M)                      | <-11                              | -11.3 |
| Hill Slope                       | 0.7 to 1.5                        | 1.15  |
| <i>17α-estradiol</i>             |                                   |       |
| log EC50 (M)                     | -9.6 to -8.1                      | -8.4  |
| log EC10 (M)                     | -10.7 to -9.3                     | -9.2  |
| Hill Slope                       | 0.9 to 2                          | 1.14  |
| <i>17α-methyltestosterone</i>    |                                   |       |
| log EC50 (M)                     | -6.0 to -5.1                      | -4.3  |
| log EC10 (M)                     | -8.0 to -6.2                      | -6.4  |
| Hill Slope                       | -                                 | -     |
| <i>Corticosterone</i>            |                                   |       |
| log EC50 (M)                     | -                                 | -     |
| log EC10 (M)                     | -                                 | -     |
| Hill Slope                       | -                                 | -     |

B-Performance Criteria for Reference Chemical in ER antagonist assay

| Reference Chemical<br>Parameter | Acceptable<br>Range (OECD<br>455) | Value |
|---------------------------------|-----------------------------------|-------|
| ICI 182,780                     |                                   |       |
| log IC50 (M)                    | -9.8 to -8.2                      | -8.9  |
| log IC30 (M)                    | -10.0 to -9.0                     | -9.1  |
| Flutamide                       |                                   |       |
| log IC50 (M)                    | -                                 | -     |
| log IC30 (M)                    | -                                 | -     |

C-Performance Criteria for Reference Chemical in AR agonist assay

| Reference Chemical Parameter          | Acceptable Range (OECD 458) | Value  |
|---------------------------------------|-----------------------------|--------|
| 5 $\alpha$ -Dehydrotestosterone (DHT) |                             |        |
| log EC50 (M)                          | -11.03 to -9.00             | -9.88  |
| log PC10 (M)                          | -12.08 to -9.87             | -10.48 |
| Hill Slope                            | 0.57 to 4.3                 | 1.79   |

D-Performance Criteria for Reference Chemical in AR antagonist assay

| Reference Chemical Parameter | Acceptable Range (OECD 458) | Value |
|------------------------------|-----------------------------|-------|
| Hydroxyflutamide (OH-FLU)    |                             |       |
| log IC50 (M)                 | -7.8 to -6.17               | -7.25 |
| log IC30 (M)                 | -8.37 to -6.41              | -7.83 |
